# Supplementary material
Source: PubMed Central journal article supplement (PMC4941438)
Supplement: pnas.1510497113.sapp.pdf [file pnas.1510497113.sapp.pdf]

# Supporting Information for Linear mixed model for heritability estimation that explicitly addresses environmental variation

Version 0.25  
Microsoft Research, April 19, 2016

This supplement is a Python notebook that generates synthetic data and illustrates the application of our code to that data. This notebook allows you to run these analyses on your computer, easily experimenting with different data-generation parameters. If you would like to do this, you need to:

- Install Python and FAST-LMM on your computer: <https://github.com/MicrosoftGenomics/FAST-LMM/blob/master/README.md>
- Download this Python notebook from [https://github.com/MicrosoftGenomics/FAST-LMM/blob/master/doc/notebooks/heritability\\_si.ipynb](https://github.com/MicrosoftGenomics/FAST-LMM/blob/master/doc/notebooks/heritability_si.ipynb)
- Start the Python notebook from the command line by typing "python notebook.py" and then opening the downloaded notebook. For details see <http://jupyter-notebook-beginner-guide.readthedocs.org/en/latest/execute.html>

## Preparing the Python Environment and Notebook

Run this cell only if these packages need to be installed or updated.

```
In [ ]:
#Main package
!pip install fastlmm>=0.2.24
#Needed by this notebook to generate synthetic SNPs
!pip install GWAS benchmark>=0.1.3
```

To prepare this notebook to run analyses, please run the following script.

```
In [1]:
# set some ipython notebook properties
%matplotlib inline
# set degree of verbosity (adapt to INFO for more verbose output or debug for info more)
import logging
logging.basicConfig(level=logging.INFO)
# set figure sizes
import pylab
pylab.rcParams['figure.figsize'] = (10, 8, 0)
# set display width for pandas data frames
import pandas as pd
pd.set_option('display.width', 1000)
# suppress warnings
import warnings
warnings.filterwarnings('ignore')
```

## Data Generation

To generate the data, we create SNPs and geo-spatial locations. We then generate the phenotype from these SNPs and geo-spatial locations. Note that, because the data is synthetic, we know the causal SNPs. Consequently, we use  $K_{causal}$  rather than its approximation,  $K_{obs}$ , in this analysis.

First, we generate 1000 SNPs per individual for 5000 individuals using the Balding-Nichols model for two populations with an FST of 0.1. The heatmap shows the resulting similarity matrix  $K_{causal}$ , highlighting the existence of two populations.

```
In [2]:
from GWAS_benchmark.snp_gen import snp_gen
from pyanptools.standardizer import Unit
seed = 0
N = 5000
#Generate SNPs
snpdata = snp_gen(fst=.1, dfr=0, iid_count=N, sid_count=1000, chr_count=10, label_with_pop=True, seed=seed)
K_causal = snpdata.read_kernel(Unit()).standardize()
pylab.subplot("SK [causal] $")
pylab.imshow(K_causal.val, cmap=pylab.gray(), vmin=0, vmax=1)
pylab.show()
```

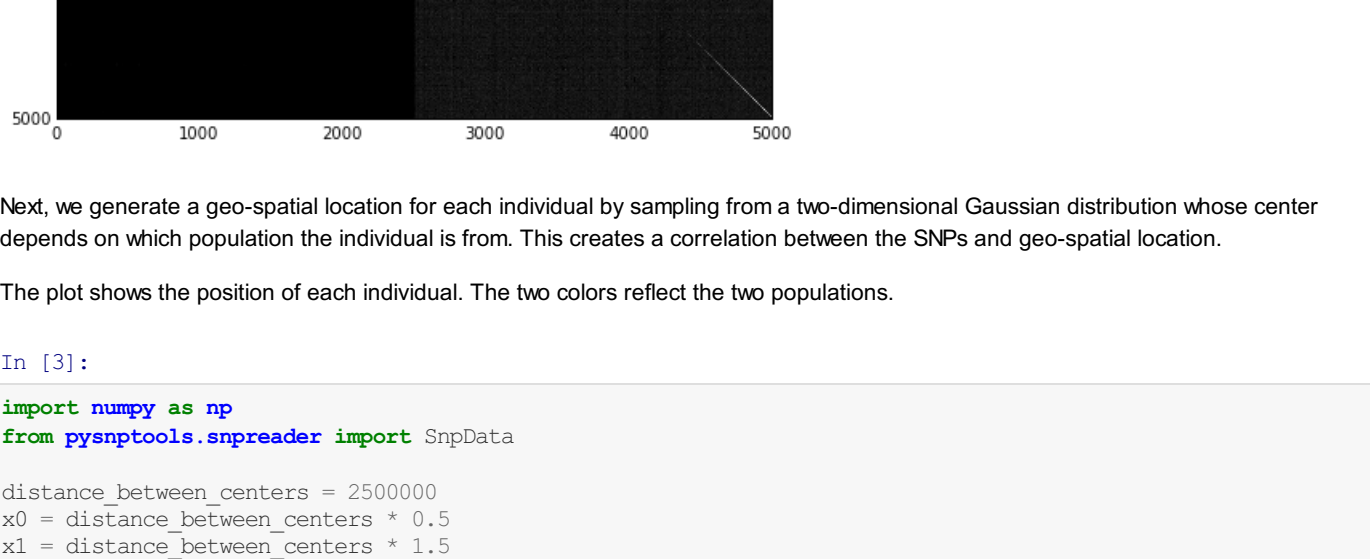

Next, we generate a geo-spatial location for each individual by sampling from a two-dimensional Gaussian distribution whose center depends on which population the individual is from. This creates a correlation between the SNPs and geo-spatial location. The plot shows the position of each individual. The two colors reflect the two populations.

```
In [3]:
import numpy as np
from pyanptools.snpreader import SnpData
distance_between_centers = 2500000
x0 = distance_between_centers * 0.5
x1 = distance_between_centers * 1.5
y0 = distance_between_centers
y1 = distance_between_centers
sd = distance_between_centers/4.
spatial_iid = snpdata.iid
center_dict = {"0": (x0,y0), "1": (x1,y1)}
centers = np.array([center_dict[iid_item[0]] for iid_item in spatial_iid])
np.random.seed(seed)
logging.info("Generating positions for seed {0}".format(seed))
spatial_val = SnpData(iid=snpdata.iid, sid=["x", "y"], val=centers*np.random.multivariate_normal([0,0],[[0,0],[1,0],[0,1]],size=len(centers)), sd,parent_string="spatial_coor_gen_original")
import matplotlib.pyplot as plt
colorF = color_dict[iid_item] for iid_item in snpdata.iid[:10]
plt.axis("equal")
plt.scatter(spatial_coor_gen_original.val[:,0], spatial_coor_gen_original.val[:,1], c=colorF)
plt.show()
```

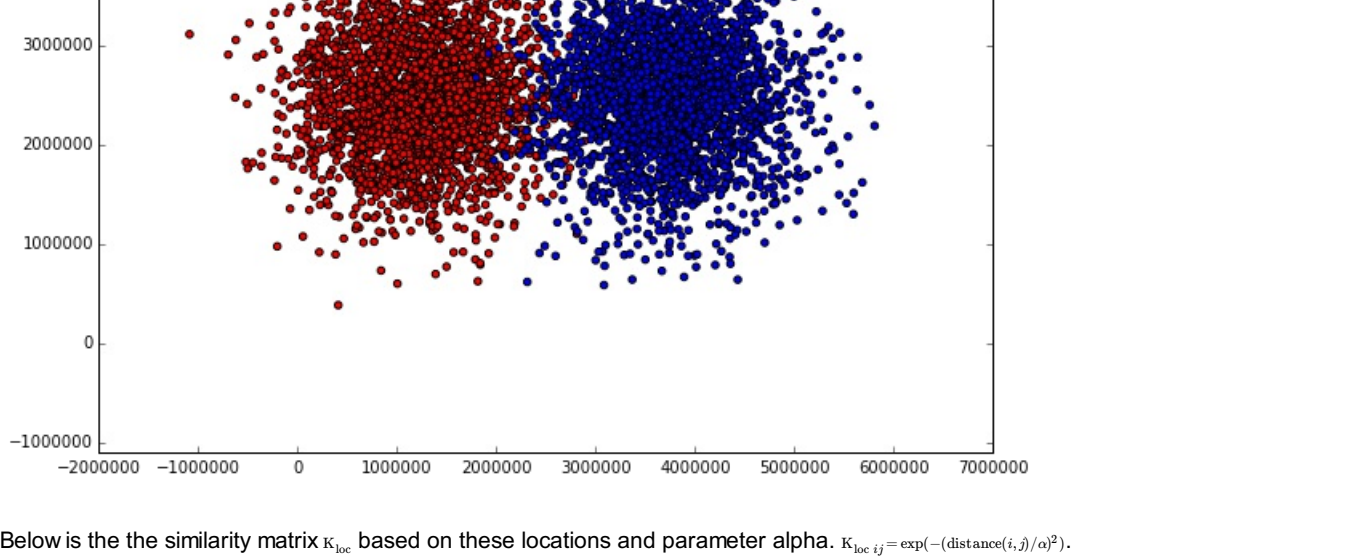

Below is the similarity matrix  $K_{loc}$  based on these locations and parameter alpha.  $K_{loc,ij} = exp(-distance(x_i, x_j)/\alpha^2)$ .

```
In [4]:
from fastlm.association.heritability_spatial_correction import spatial_similarity
from pyanptools.kernelreader import KernelData
alpha = distance_between_centers
spatial_val = spatial_similarity(spatial_coor_gen_original.val, alpha, power=2)
K_loc = KernelData(iid=snpdata.iid, val=spatial_val).standardize()
pylab.subplot("SK [loc] $")
pylab.imshow(K_loc.val, cmap=pylab.gray(), vmin=0, vmax=1)
pylab.show()
```

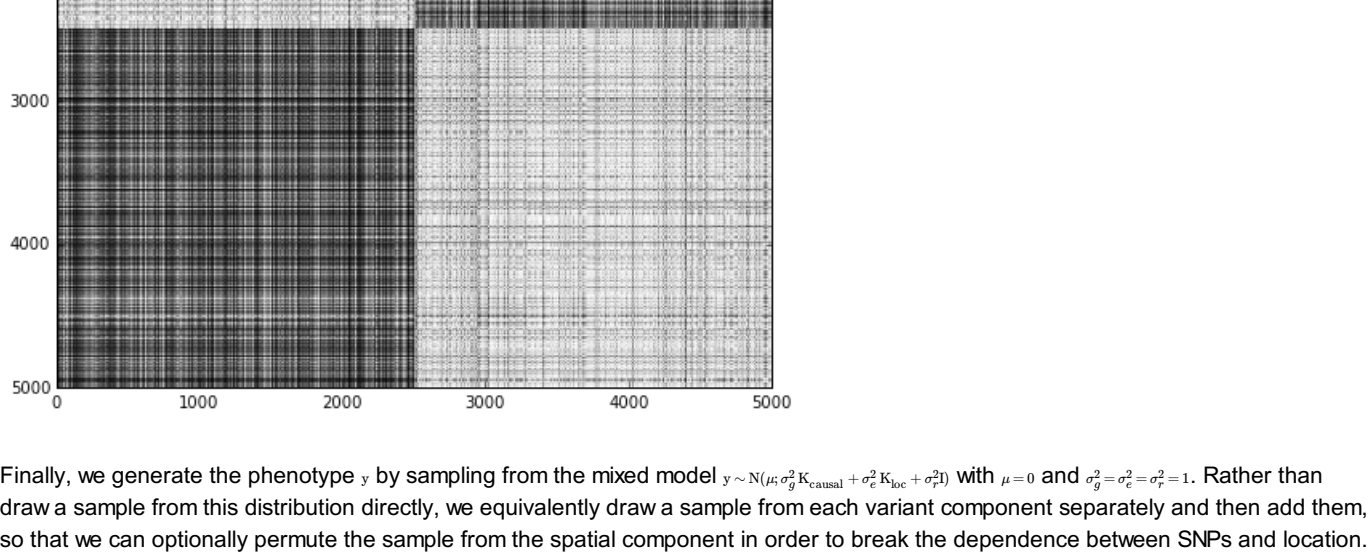

Finally, we generate the phenotype - by sampling from the mixed model  $y = \sum_{i=1}^N \beta_i K_{causal} + \epsilon$  with  $\beta_i = 0$  and  $\epsilon_i \sim N(0, \sigma^2)$ . Rather than draw a sample from this distribution directly, we equivalently draw a sample from each variant component separately and then add them, so that we can optionally permute the sample from the spatial component in order to break the dependence between SNPs and location.

```
In [5]:
from pyanptools.snpreader import SnpData
iid = K_causal.iid
iid_count = K_causal.iid_count
np.random.seed(seed)
pheno_causal = SnpData(iid=iid, sid=["causal"], val=np.random.multivariate_normal(np.zeros(iid_count), K_causal.val).reshape(-1,1), parent_string="causal")
pheno_noise = SnpData(iid=iid, sid=["noise"], val=np.random.normal(size=iid_count).reshape(-1,1), parent_string="noise")
np.random.seed(seed)
pheno_loc_original = SnpData(iid=iid, sid=["loc_original"], val=np.random.multivariate_normal(np.zeros(iid_count), K_loc.val).reshape(-1,1), parent_string="loc_original")
do_shuffle = False
idx = np.arange(iid_count)
np.random.shuffle(idx)
pheno_loc = pheno_loc_original.read(view_ok=True) #don't need to copy, because the next line will be fresh memory
pheno_loc.val = pheno_loc.val[idx,:]
else:
    pheno_loc = pheno_loc_original
pheno = SnpData(iid=iid, sid=["pheno_all"], val=pheno_causal.val+pheno_noise.val+pheno_loc.val)
is_pop0 = snpdata.iid[:10]=="0"
is_pop1 = snpdata.iid[:10]=="1"
print "pop0 mean={0}, pop1 mean={1}".format(pheno.val[is_pop0].mean(), pheno.val[is_pop1].mean())
pylab.subplot("Phenotype $")
plt.plot(range(sum(is_pop0)), pheno.val[is_pop0], "r.", range(sum(is_pop1), pheno.val[is_pop1]), "b.")
plt.show()
pop0 mean=1.367991888321, pop1 mean=1.12081610957
```

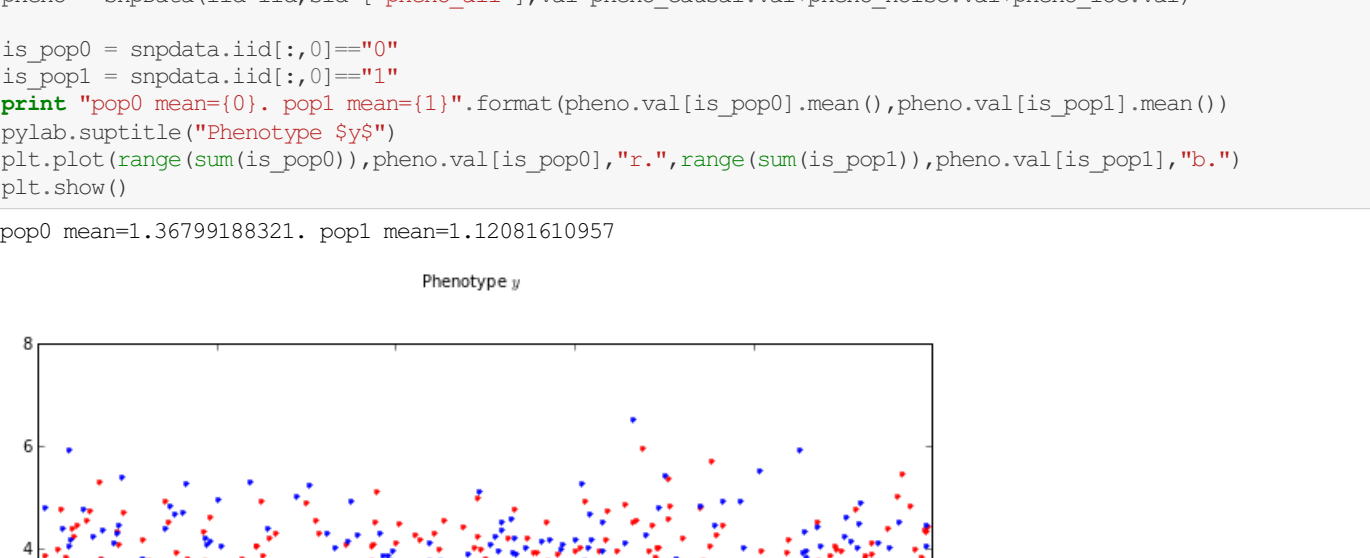

## Analysis

Now let us estimate heritabilities using our methodology. The method takes as input  $K_{causal}$ , geo-spatial location, and phenotype. It searches for the best  $\alpha$  and then estimates  $h^2$  using REML. The Python function that performs the analysis is called 'heritability\_spatial\_correction'.

Here we loop over multiple random seeds in order to generate and analyze multiple data sets. Python function 'loop\_generate\_and\_analyze' does the looping. It calls 'generate\_and\_analyze' which generates the data for each seed and calls 'heritability\_spatial\_correction' to analyze the data.

```
In [6]:
from GWAS_benchmark.snp_gen import snp_gen
from pyanptools.standardizer import Unit
import numpy as np
from fastlm.association.heritability_spatial_correction import spatial_similarity
from pyanptools.kernelreader import KernelData
from GWAS_benchmark.semisynt_simulations import generate_phenotype
from fastlm.association import heritability_spatial_correction
def loop_generate_and_analyze(seed, N, do_shuffle, just_testing=True, map_function=None, cache_folder=None):
    #Generate SNPs
    snpdata = snp_gen(fst=.1, dfr=0, iid_count=N, sid_count=1000, chr_count=10, label_with_pop=True, seed=seed)
    K_causal = snpdata.read_kernel(Unit()).standardize()
    #Generate geo-spatial locations and K_loc
    distance_between_centers = 2500000
    x0 = distance_between_centers * 0.5
    x1 = distance_between_centers * 1.5
    y0 = distance_between_centers
    y1 = distance_between_centers
    sd = distance_between_centers/4.
    spatial_iid = snpdata.iid
    center_dict = {"0": (x0,y0), "1": (x1,y1)}
    centers = np.array([center_dict[iid_item[0]] for iid_item in spatial_iid])
    logging.info("Generating positions for seed {0}".format(seed))
    spatial_val = SnpData(iid=snpdata.iid, sid=["x", "y"], val=centers*np.random.multivariate_normal([0,0],[[0,0],[1,0],[0,1]],size=len(centers)), sd,parent_string="spatial_coor_gen_original")
    spatial_val = spatial_similarity(spatial_val, alpha, power=2)
    K_loc = KernelData(iid=snpdata.iid, val=spatial_val).standardize()
    #Generate phenotype
    iid = K_causal.iid
    iid_count = K_causal.iid_count
    np.random.seed(seed)
    pheno_causal = SnpData(iid=iid, sid=["causal"], val=np.random.multivariate_normal(np.zeros(iid_count), K_causal.val).reshape(-1,1), parent_string="causal")
    pheno_noise = SnpData(iid=iid, sid=["noise"], val=np.random.normal(size=iid_count).reshape(-1,1), parent_string="noise")
    np.random.seed(seed)
    pheno_loc_original = SnpData(iid=iid, sid=["loc_original"], val=np.random.multivariate_normal(np.zeros(iid_count), K_loc.val).reshape(-1,1), parent_string="loc_original")
    if do_shuffle:
        idx = np.arange(iid_count)
        np.random.shuffle(idx)
        pheno_loc = pheno_loc_original.read(view_ok=True) #don't need to copy, because the next line will be fresh memory
        pheno_loc.val = pheno_loc.val[idx,:]
    else:
        pheno_loc = pheno_loc_original
    pheno = SnpData(iid=iid, sid=["pheno_all"], val=pheno_causal.val+pheno_noise.val+pheno_loc.val)
    #Analyze data
    alpha_list = [int(v) for v in np.logspace(np.log10(100), np.log10(1e10), 100)]
    dataframe = heritability_spatial_correction(snpdata, spatial_coor_val=spatial_val, spatial_loc_val=spatial_val, alpha_list=alpha_list, jackknife_count=0, permute_plus, alpha_list=alpha_list, template="azure_taaS_USCentral", map_function=map_function, cache_folder=cache_folder)
    logging.info(dataframe)
    return dataframe
def loop_generate_and_analyze(N, seed_count, do_shuffle, just_testing, map_function=None, cache_folder=None):
    """
    run generate_and_analyze on different seeds
    """
    df_list = []
    for seed in xrange(seed_count):
        if cache_folder is not None:
            cache_folder_per_seed = cache_folder.format(seed)
        else:
            cache_folder_per_seed = None
        df = loop_generate_and_analyze(seed=seed, N=N, do_shuffle=do_shuffle, just_testing=just_testing, map_function=map_function, cache_folder=cache_folder_per_seed)
        df_list.append(df)
    #format the output dataframe
    df2 = pd.concat(df_list)
    df2["seed"] = range(seed_count)
    df2["N"] = N
    df2["do_shuffle"] = do_shuffle
    df3 = df2[["seed", "N", "do_shuffle", "alpha", "h2corr", "e2", "h2uncorr"]]
    df3.set_index(["seed"], inplace=True)
    return df3
```

## Test Run

To test 'loop\_generate\_and\_analyze', we'll run it first locally with 'N=100' and 'just\_testing=True'. With these settings, it should return in just a few seconds, but without meaningful results.

```
In [7]:
df = loop_generate_and_analyze(N=100, seed_count=7, do_shuffle=True, just_testing=True, map_function=map)
df
```

```
Out [7]:
```

| seed | N   | do_shuffle | alpha   | h2corr | e2 | h2uncorr |
|------|-----|------------|---------|--------|----|----------|
| 0    | 100 | True       | 2500000 | 0      | 0  | 0        |
| 1    | 100 | True       | 2500000 | 0      | 0  | 0        |
| 2    | 100 | True       | 2500000 | 0      | 0  | 0        |
| 3    | 100 | True       | 2500000 | 0      | 0  | 0        |
| 4    | 100 | True       | 2500000 | 0      | 0  | 0        |
| 5    | 100 | True       | 2500000 | 0      | 0  | 0        |
| 6    | 100 | True       | 2500000 | 0      | 0  | 0        |

## Full Run

The full run with 5000 individuals and 7 datasets requires a cluster. Here we use HPC cluster (Azure or private), but any cluster that can mimic Python's 'map' function may be used. Even with a cluster, the run can take a long time. If you'd like to get a result more quickly, you could (e.g.) set N=500 and generate fewer datasets.

```
In [8]:
#Define a version of 'map' in terms of a cluster
from fastlm.association.heritability_spatial_correction import work_item
from fastlm.util import distributed_map
from fastlm.util.runner import HPC
azure_runner_function = lambda taskcount: HPC(min(taskcount, 10100), 'GCR', r"\\GCR\Scratch\A2-USCentral\science\carl\data\carl\pythorpath",
                                             remote_python_parent=r"\\GCR\Scratch\A2-USCentral\science\carl\data\carl\pythorpath",
                                             unit='Core', #Core, Socket, Node
                                             update_remote_python_parent=True,
                                             template="azure_taaS_USCentral",
                                             runtime="0:8:0",
                                             mkl_num_threads=1
                                             )
msr_core_runner_function = lambda taskcount: HPC(min(taskcount, 10100), 'GCR', r"\\GCR\Scratch\B99\science\carl\data\carl\pythorpath",
                                             remote_python_parent=r"\\GCR\Scratch\B99\science\carl\data\carl\pythorpath",
                                             unit='node', #Core, Socket, Node
                                             update_remote_python_parent=True,
                                             template="Express0",
                                             priority="Normal",
                                             runtime="0:4:0", # day:hour:min
                                             )
map_function = lambda ignore, arg_list, runner_function=msr_core_runner_function, fn_list=[]: distributed_map_d.map(work_item, arg_list, runner_function(len(arg_list), fn_list))
#Generate data and analyze it.
N=5000
seed_count=1
do_shuffle=False
cache_pattern="D:\data\synth\N{0}\seed{1}".format(N, "{0}")
df = loop_generate_and_analyze(N=N, seed_count=seed_count, do_shuffle=do_shuffle, just_testing=False, map_function=map_function, cache_folder=cache_pattern)
df
```

```
Out [8]:
```

| seed | N    | do_shuffle | alpha   | h2corr   | e2       | h2uncorr |
|------|------|------------|---------|----------|----------|----------|
| 0    | 5000 | False      | 2782559 | 0.308252 | 0.399458 | 0.455674 |

Here are the outputs for 50 seeds.

| seed | N    | do_shuffle | alpha   | h2corr | e2    | h2uncorr |
|------|------|------------|---------|--------|-------|----------|
| 0    | 5000 | FALSE      | 2782559 | 0.308  | 0.399 | 0.456    |
| 1    | 5000 | FALSE      | 2782559 | 0.201  | 0.586 | 0.408    |
| 2    | 5000 | FALSE      | 2782559 | 0.399  | 0.198 | 0.477    |
| 3    | 5000 | FALSE      | 3351602 | 0.273  | 0.465 | 0.465    |
| 4    | 5000 | FALSE      | 2310129 | 0.367  | 0.242 | 0.460    |
| 5    | 5000 | FALSE      | 2310129 | 0.332  | 0.237 | 0.473    |
| 6    | 5000 | FALSE      | 2310129 | 0.396  | 0.331 | 0.431    |
| 7    | 5000 | FALSE      | 3351602 | 0.393  | 0.208 | 0.482    |
| 8    | 5000 | FALSE      | 2310129 | 0.391  | 0.211 | 0.461    |
| 9    | 5000 | FALSE      | 2310129 | 0.380  | 0.267 | 0.495    |
| 10   | 5000 | FALSE      | 2782559 | 0.251  | 0.564 | 0.431    |
| 11   | 5000 | FALSE      | 2782559 | 0.276  | 0.439 | 0.455    |
| 12   | 5000 | FALSE      | 2310129 | 0.303  | 0.423 | 0.469    |
| 13   | 5000 | FALSE      | 2782559 | 0.199  | 0.582 | 0.386    |
| 14   | 5000 | FALSE      | 2310129 | 0.405  | 0.177 | 0.474    |
| 15   | 5000 | FALSE      | 2310129 | 0.377  | 0.264 | 0.488    |
| 16   | 5000 | FALSE      | 2310129 | 0.438  | 0.110 | 0.469    |
| 17   | 5000 | FALSE      | 2782559 | 0.293  | 0.343 | 0.458    |
| 18   | 5000 | FALSE      | 2310129 | 0.397  | 0.342 | 0.452    |
| 19   | 5000 | FALSE      | 1917910 | 0.373  | 0.258 | 0.450    |
| 20   | 5000 | FALSE      | 2782559 | 0.377  | 0.272 | 0.459    |
| 21   | 5000 | FALSE      | 2310129 | 0.350  | 0.230 | 0.453    |
| 22   | 5000 | FALSE      | 2310129 | 0.342  | 0.363 | 0.482    |
| 23   | 5000 | FALSE      | 2782559 | 0.273  | 0.442 | 0.428    |
| 24   | 5000 | FALSE      | 2310129 | 0.326  | 0.359 | 0.464    |
| 25   | 5000 | FALSE      | 2782559 | 0.352  | 0.319 | 0.485    |
| 26   | 5000 | FALSE      | 2310129 | 0.336  | 0.303 | 0.421    |
| 27   | 5000 | FALSE      | 4037017 | 0.364  | 0.297 | 0.507    |
| 28   | 5000 | FALSE      | 2310129 | 0.302  | 0.376 | 0.407    |
| 29   | 5000 | FALSE      | 2782559 | 0.259  | 0.503 | 0.477    |
| 30   | 5000 | FALSE      | 1321941 | 0.470  | 0.063 | 0.492    |
| 31   | 5000 | FALSE      | 2310129 | 0.322  | 0.354 | 0.451    |
| 32   | 5000 | FALSE      | 2782559 | 0.286  | 0.481 | 0.430    |
| 33   | 5000 | FALSE      | 2782559 | 0.259  | 0.398 | 0.412    |
| 34   | 5000 | FALSE      | 2782559 | 0.357  | 0.268 | 0.476    |
| 35   | 5000 | FALSE      | 2310129 | 0.314  | 0.398 | 0.440    |
| 36   | 5000 | FALSE      | 2782559 | 0.181  | 0.280 | 0.492    |
| 37   | 5000 | FALSE      | 2310129 | 0.293  | 0.419 | 0.405    |
| 38   | 5000 | FALSE      | 2782559 | 0.285  | 0.435 | 0.444    |
| 39   | 5000 | FALSE      | 2310129 | 0.344  | 0.314 | 0.474    |
| 40   | 5000 | FALSE      | 2782559 | 0.363  | 0.479 | 0.452    |
| 41   | 5000 | FALSE      | 2782559 | 0.253  | 0.492 | 0.411    |
| 42   | 5000 | FALSE      | 2782559 | 0.235  | 0.515 | 0.422    |
| 43   | 5000 | FALSE      | 2782559 | 0.318  | 0.355 | 0.431    |
| 44   | 5000 | FALSE      | 2782559 | 0.353  | 0.327 | 0.487    |
| 45   | 5000 | FALSE      | 3351602 | 0.247  | 0.504 | 0.463    |
| 46   | 5000 | FALSE      | 2782559 | 0.182  | 0.206 | 0.501    |
| 47   | 5000 | FALSE      | 2782559 | 0.287  | 0.404 | 0.450    |
| 48   | 5000 | FALSE      | 2310129 | 0.396  | 0.259 | 0.491    |
| 49   | 5000 | FALSE      | 2782559 | 0.359  | 0.280 | 0.471    |

The mean (± SE) of h2corr, e2, and h2uncorr are 0.33±0.01, 0.35±0.02, and 0.46±0.01, respectively.

Here are the outputs for the same 50 seeds with do\_shuffle=true, which breaks the dependence between SNPs and location.

| seed | N    | do_shuffle | alpha   | h2corr | e2    | h2uncorr |
|------|------|------------|---------|--------|-------|----------|
| 0    | 5000 | TRUE       | 2782559 | 0.275  | 0.465 | 0.382    |
| 1    | 5000 | TRUE       | 2310129 | 0.282  | 0.421 | 0.362    |
| 2    | 5000 | TRUE       | 2310129 | 0.396  | 0.203 | 0.485    |
| 3    | 5000 | TRUE       | 2310129 | 0.344  | 0.323 | 0.353    |
| 4    | 5000 | TRUE       | 1917910 | 0.407  | 0.157 | 0.450    |
| 5    | 5000 | TRUE       | 2310129 | 0.386  | 0.256 | 0.463    |
| 6    | 5000 | TRUE       | 3351602 | 0.181  | 0.342 | 0.446    |
| 7    | 5000 | TRUE       | 2310129 | 0.326  | 0.120 | 0.438    |
| 8    | 5000 | TRUE       | 1917910 | 0.444  | 0.101 | 0.460    |
| 9    | 5000 | TRUE       | 2782559 | 0.301  | 0.418 | 0.411    |
| 10   | 5000 | TRUE       | 1917910 | 0.318  | 0.309 | 0.399    |
| 11   | 5000 | TRUE       | 2782559 | 0.315  | 0.395 | 0.454    |
| 12   | 5000 | TRUE       | 2310129 | 0.314  | 0.400 | 0.460    |
| 13   | 5000 | TRUE       | 2782559 | 0.222  | 0.533 | 0.393    |
| 14   | 5000 | TRUE       | 1917910 | 0.399  | 0.177 | 0.476    |
| 15   | 5000 | TRUE       | 2782559 | 0.280  | 0.453 | 0.468    |
| 16   | 5000 | TRUE       | 2310129 | 0.433  | 0.119 | 0.468    |
| 17   | 5000 | TRUE       | 2782559 | 0.311  | 0.398 | 0.390    |
| 18   | 5000 | TRUE       | 2782559 | 0.297  | 0.421 | 0.385    |
| 19   | 5000 | TRUE       | 2310129 | 0.312  | 0.479 | 0.458    |
| 20   | 5000 | TRUE       | 2782559 | 0.354  | 0.282 | 0.447    |
| 21   | 5000 | TRUE       | 2310129 | 0.390  | 0.209 | 0.418    |
| 22   | 5000 | TRUE       | 2782559 | 0.277  | 0.485 | 0.325    |
| 23   | 5000 | TRUE       | 2782559 | 0.277  | 0.435 | 0.437    |
| 24   | 5000 | TRUE       | 2310129 | 0.356  | 0.299 | 0.436    |
| 25   | 5000 | TRUE       | 2310129 | 0.402  | 0.224 | 0.473    |
| 26   | 5000 | TRUE       | 1917910 | 0.352  | 0.271 | 0.351    |
| 27   | 5000 | TRUE       | 4862601 | 0.316  | 0.388 | 0.491    |
| 28   | 5000 | TRUE       | 2782559 | 0.263  | 0.479 | 0.365    |
| 29   | 5000 | TRUE       | 2782559 | 0.299  | 0.427 | 0.477    |
| 30   | 5000 | TRUE       | 1502282 | 0.474  | 0.056 | 0.471    |
| 31   | 5000 | TRUE       | 2782559 | 0.276  | 0.447 | 0.413    |
| 32   | 5000 | TRUE       | 2782559 | 0.266  | 0.460 | 0.348    |
| 33   | 5000 | TRUE       | 2310129 | 0.326  | 0.322 | 0.426    |
| 34   | 5000 | TRUE       | 3351602 | 0.309  | 0.368 | 0.476    |
| 35   | 5000 | TRUE       | 2782559 | 0.246  | 0.527 | 0.332    |
| 36   | 5000 | TRUE       | 2310129 | 0.421  | 0.184 | 0.482    |
| 37   | 5000 | TRUE       | 2782559 | 0.267  | 0.454 | 0.401    |
| 38   | 5000 | TRUE       | 2782559 | 0.269  | 0.468 | 0.400    |
| 39   | 5000 | TRUE       | 2310129 | 0.363  | 0.275 | 0.445    |
| 40   | 5000 | TRUE       | 2310129 | 0.342  | 0.334 | 0.451    |
| 41   | 5000 | TRUE       | 2782559 | 0.273  | 0.450 | 0.311    |
| 42   | 5000 | TRUE       | 2310129 | 0.300  | 0.381 | 0.301    |
| 43   | 5000 | TRUE       | 2782559 | 0.287  | 0.417 | 0.423    |
| 44   | 5000 | TRUE       | 2782559 | 0.377  | 0.281 | 0.383    |
| 45   | 5000 | TRUE       | 2782559 | 0.320  | 0.358 |          |
